# Supplementary material for: Genetic Variants Influencing Biomarkers of Nutrition Are Not Associated with Cognitive Capability in Middle-Aged and Older Adults
Source: PubMed Central journal article supplement (PMC3738233; doi:10.3945/jn.112.171520), 2013-03-06
Supplement: jn.112.171520_nutrition171520SupplementaryData.pdf [file jn.112.171520_nutrition171520SupplementaryData.pdf]

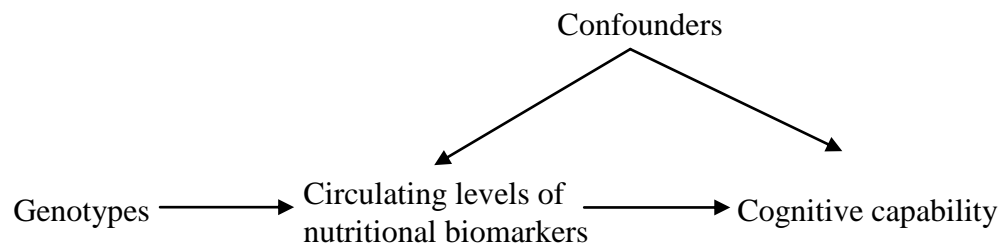

**Supplemental Figure 1. Directed Acyclic Graph Representing a Genotype-Based Analysis of the Effects of Circulating Levels of Nutritional Biomarkers on Cognitive Capability**

Genotypes, (e.g. SNP rs6564851) are strongly associated with a nutritional biomarker (e.g.  $\beta$ -carotene) but are not associated with confounders (e.g. levels of physical activity) and are not implicated in measures of cognitive capability except through their effects on the nutritional biomarker.

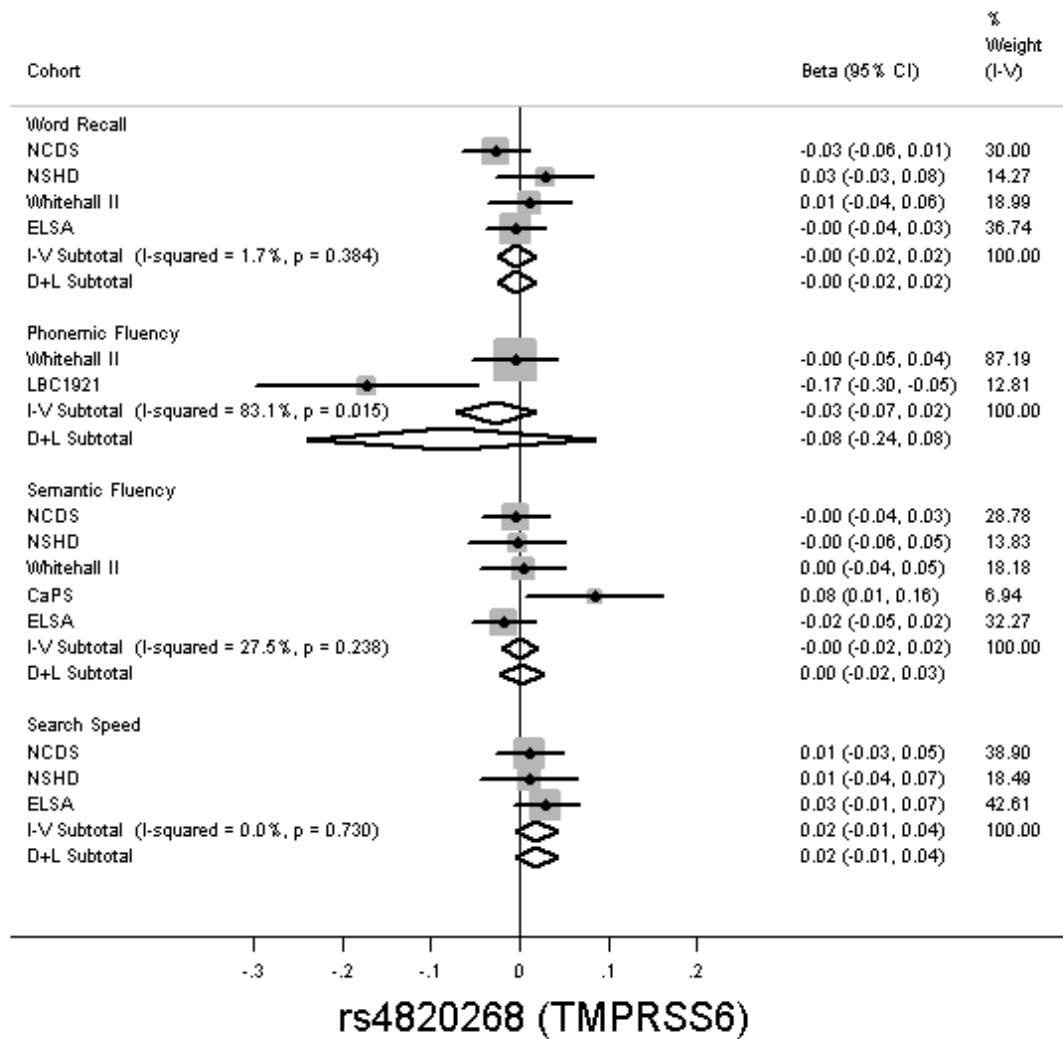

**Supplemental Figure 2. Associations between Cognitive Capability Measures and rs4820268 (TMPRSS6) Genotype**

Beta coefficients based on z-scores per A allele adjusted for age, sex, height and weight.

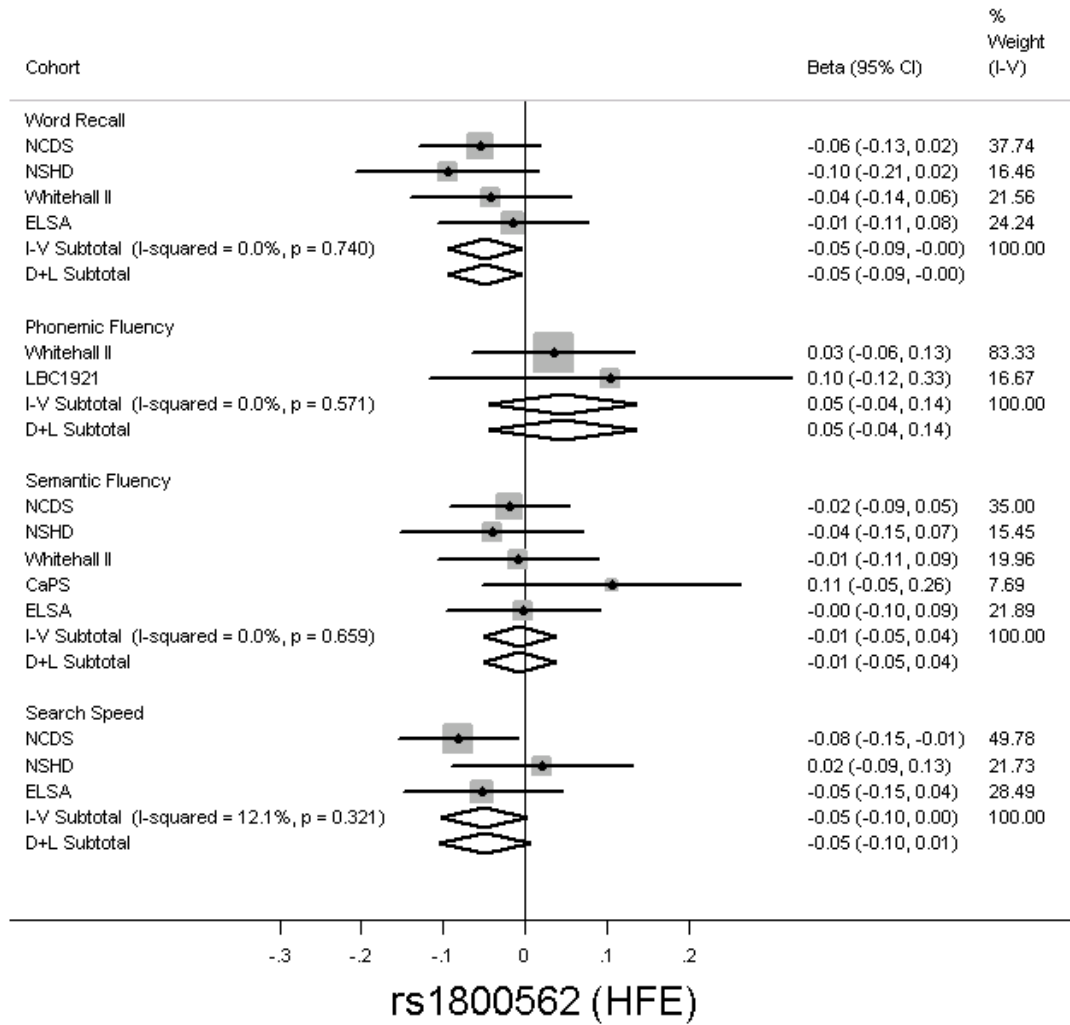

**Supplemental Figure 3. Associations between Cognitive Capability Measures and rs1800562 (HFE) Genotype**

Beta coefficients based on z-scores A/G+A/A vs G/G adjusted for age and sex.

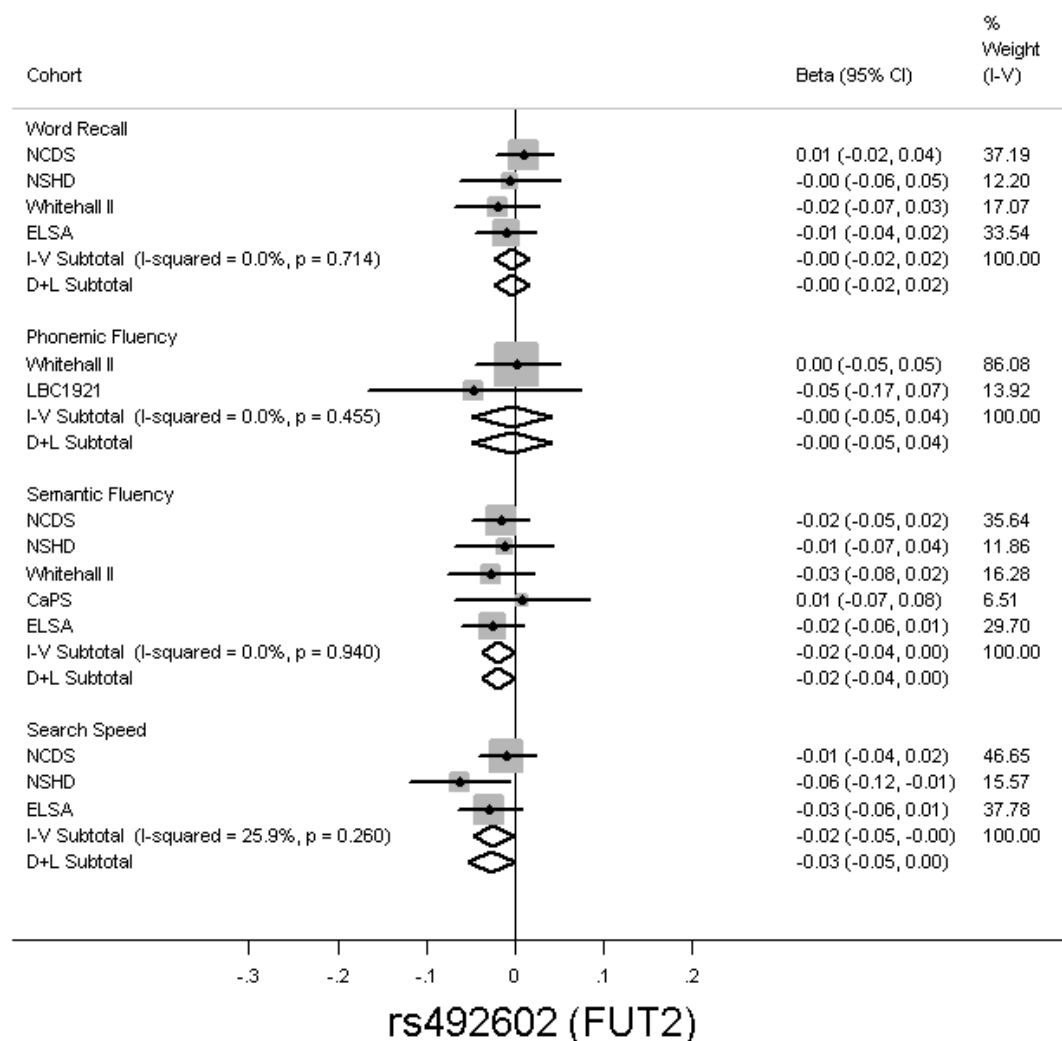

**Supplemental Figure 4. Associations between Cognitive Capability Measures and rs492602 (*FUT2*) Genotype**

Beta coefficients based on z-scores per G allele adjusted for age and sex.

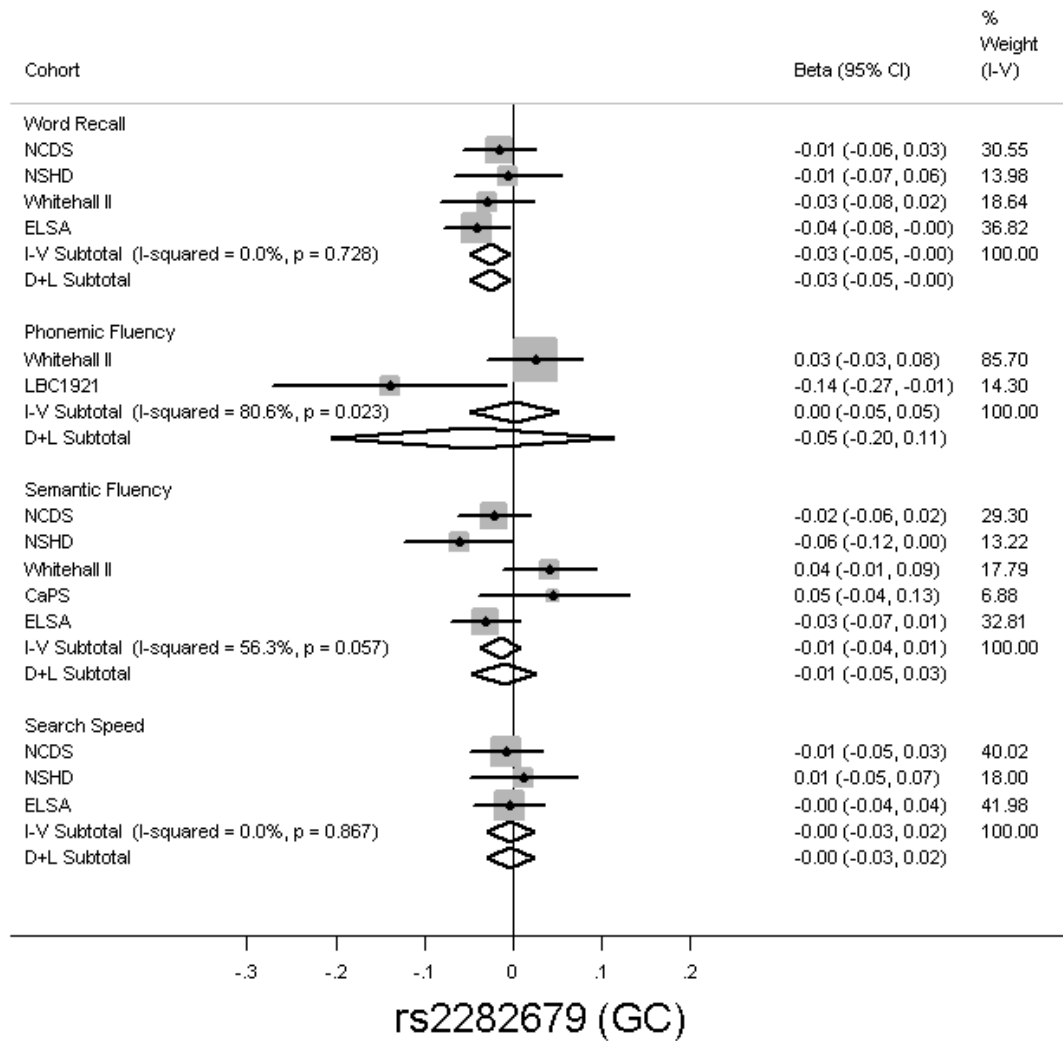

**Supplemental Figure 5. Associations between Cognitive Capability Measures and rs2282679 (GC) Genotype**

Beta coefficients based on z-scores per T allele adjusted for age and sex.

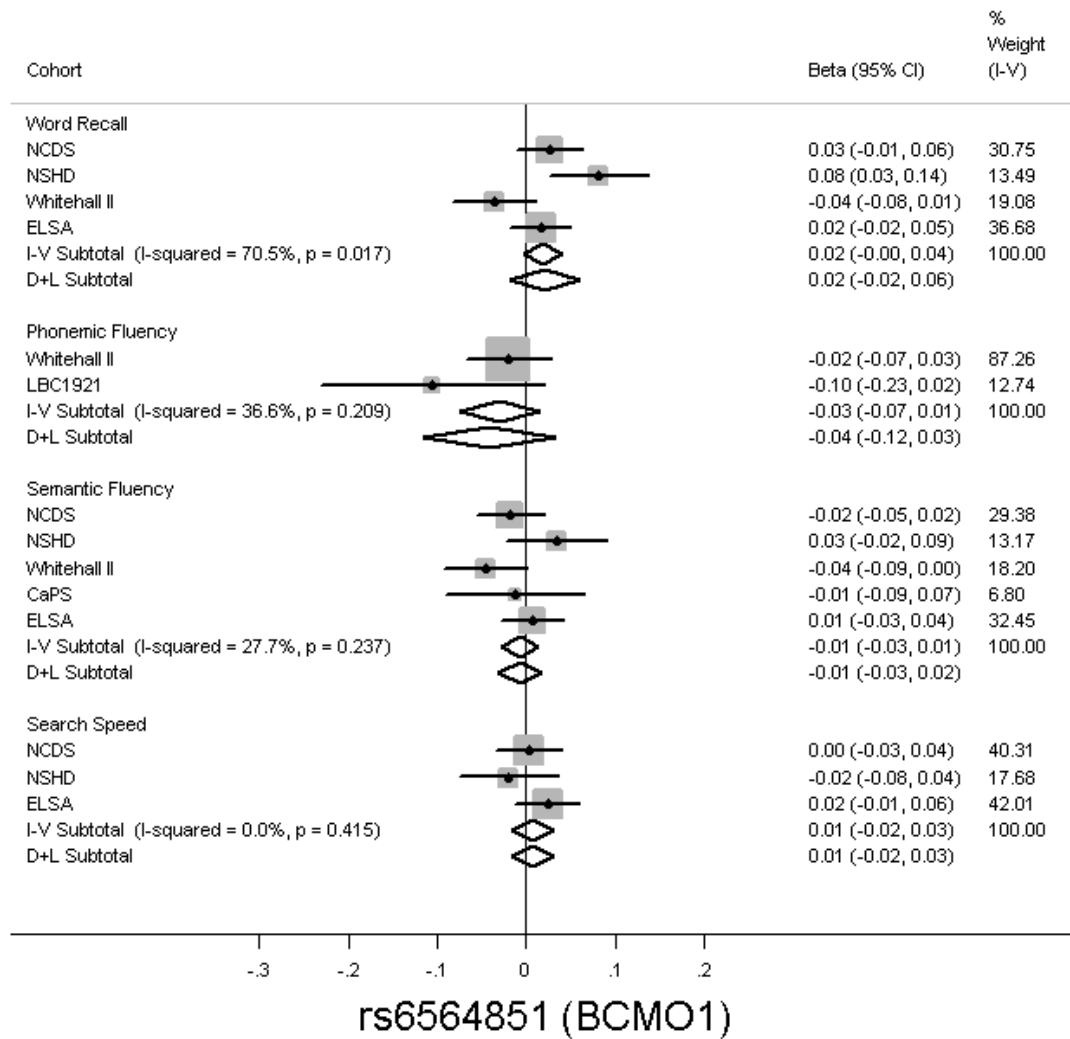

**Supplemental Figure 6. Associations between Cognitive Capability Measures and rs6564851 (BCMO1) Genotype**

Beta coefficients based on z-scores per G allele adjusted for age and sex.

**Supplemental Table 1. Summary of Body Size and Demographic Characteristics by Cohort**

| Characteristic                         | Cohort      |             |              |             |             |             |
|----------------------------------------|-------------|-------------|--------------|-------------|-------------|-------------|
|                                        | NCDS        | NSHD        | Whitehall II | CaPS        | ELSA        | LBC1921     |
| <i>Body size, mean ± sd</i>            |             |             |              |             |             |             |
| Height in cm                           | 169.3 ± 9.3 | 168.2 ± 8.9 | 172.3 ± 8.7  | 171.4 ± 6.4 | 165.7 ± 9.4 | 163.2 ± 9.3 |
| Weight in kg                           | 78.7 ± 16.3 | 77.5 ± 14.8 | 79.4 ± 13.8  | 78.3 ± 12.0 | 76.4 ± 15.3 | 69.9 ± 12.8 |
| BMI in kg/m <sup>2</sup>               | 27.4 ± 4.9  | 27.4 ± 4.7  | 26.7 ± 4.2   | 26.6 ± 3.6  | 27.8 ± 4.7  | 26.2 ± 4.1  |
| Waist-hip ratio                        | 0.87 ± 0.09 | 0.87 ± 0.09 | 0.91 ± 0.09  | 0.93 ± 0.06 | 0.89 ± 0.08 | -           |
| <i>Demographics, %</i>                 |             |             |              |             |             |             |
| Physical activity, active              | 58          | 51          | 41           | 83          | 41          | 52          |
| Alcohol <sup>1</sup> , at least weekly | 74          | 73          | 87           | 83          | 63          | 76          |
| Smoking status, current/ex             | 53          | 71          | 49           | 82          | 62          | 56          |
| SEP, professional/managerial           | 48          | 44          | -            | 24          | 36          | 58          |

<sup>1</sup> NSHD: more frequently than on special occasions. SEP: socio-economic position.

**Supplemental Table 2. Summary of Pooled Associations between Genotypes Associated with Serum Iron and Anthropometry and Potential Confounders for Cognitive Capability**

| Potential Confounder                   | rs4820268 ( <i>TMPRSS6</i> ) |        |                         |             | rs1800562 ( <i>HFE</i> ) |      |                         |             |
|----------------------------------------|------------------------------|--------|-------------------------|-------------|--------------------------|------|-------------------------|-------------|
|                                        | Beta (95% CI)                | P      | I <sup>2</sup> %; Het P | n           | Beta (95% CI)            | P    | I <sup>2</sup> %; Het P | n           |
| Height, cm                             | 0.004 (-0.010, 0.019)        | 0.57   | 0.0; 0.9996             | 18093       | 0.014 (-0.017, 0.045)    | 0.38 | 0.0; 0.93               | 15790       |
| Weight, kg                             | -0.022 (-0.040, -0.003)      | 0.0227 | 0.0; 0.83               | 18002       | 0.026 (-0.038, 0.089)    | 0.42 | 54.0; 0.052             | 15695       |
| BMI, kg/m <sup>2</sup>                 | -0.026 (-0.046, -0.005)      | 0.0132 | 0.0; 0.75               | 17977       | 0.027 (-0.049, 0.103)    | 0.49 | 61.6; 0.023             | 15713       |
| WHR                                    | -0.004 (-0.019, 0.012)       | 0.64   | 0.0; 0.96               | 17642       | 0.032 (-0.006, 0.069)    | 0.10 | 15.4; 0.32              | 15317       |
|                                        | OR (95% CI)                  | P      | I <sup>2</sup> %; Het P | n/N         | OR (95% CI)              | P    | I <sup>2</sup> %; Het p | n/N         |
| Physical activity, active vs. not      | 0.999 (0.957, 1.043)         | 0.97   | 0.0; 0.51               | 8789/17711  | 0.927 (0.817, 1.053)     | 0.24 | 38.8; 0.15              | 7818/15319  |
| Alcohol, weekly vs. less frequent      | 0.961 (0.915, 1.010)         | 0.11   | 0.0; 0.95               | 13166/17763 | 1.022 (0.918, 1.137)     | 0.67 | 0.0; 0.84               | 11759/15629 |
| Smoking status, current/ex vs. never   | 1.004 (0.936, 1.076)         | 0.92   | 53.4; 0.057             | 10851/18205 | 1.063 (0.969, 1.165)     | 0.20 | 0.0; 0.74               | 9393/15828  |
| SEP, professional/managerial vs. other | 0.979 (0.933, 1.027)         | 0.39   | 0.0; 0.87               | 5901/14336  | 1.071 (0.947, 1.212)     | 0.27 | 21.1; 0.28              | 5030/12016  |

SEP: socio-economic position. Coefficients for rs4820268: per A allele; rs1800562: A/G+A/A vs. G/G. Models for height, weight, BMI and WHR based on z-scores. All coefficients adjusted for age and sex.



**Supplemental Table 3. Summary of Pooled Associations between Genotypes Associated with Vitamin B<sub>12</sub> and Vitamin D and Anthropometry and Potential Confounders for Cognitive Capability**

| Potential<br>Confounder                | rs492602 ( <i>FUT2</i> ) |      |                         |             | rs2282679 ( <i>GC</i> ) |      |                         |             |
|----------------------------------------|--------------------------|------|-------------------------|-------------|-------------------------|------|-------------------------|-------------|
|                                        | Beta (95% CI)            | P    | I <sup>2</sup> %; Het P | n           | Beta (95% CI)           | P    | I <sup>2</sup> %; Het P | n           |
| Height, cm                             | -0.007 (-0.026, 0.012)   | 0.45 | 34.3; 0.18              | 19908       | 0.015 (-0.001, 0.031)   | 0.07 | 0.0; 0.73               | 18150       |
| Weight, kg                             | -0.011 (-0.029, 0.007)   | 0.24 | 0.0; 0.44               | 19782       | 0.004 (-0.017, 0.024)   | 0.72 | 0.0; 0.60               | 18063       |
| BMI, kg/m <sup>2</sup>                 | -0.007 (-0.027, 0.012)   | 0.45 | 0.0; 0.46               | 19780       | -0.007 (-0.030, 0.015)  | 0.53 | 0.0; 0.75               | 18034       |
| WHR                                    | 0.017 (-0.002, 0.035)    | 0.08 | 29.4; 0.23              | 19462       | 0.003 (-0.014, 0.020)   | 0.75 | 0.0; 0.93               | 17703       |
|                                        | OR (95% CI)              | P    | I <sup>2</sup> %; Het P | n/N         | OR (95% CI)             | P    | I <sup>2</sup> %; Het P | n/N         |
| Physical activity, active vs. not      | 0.972 (0.921, 1.027)     | 0.31 | 32.4; 0.19              | 9870/19547  | 1.000 (0.954, 1.049)    | 0.99 | 0.0; 0.73               | 8820/17776  |
| Alcohol, weekly vs. less frequent      | 1.039 (0.982, 1.099)     | 0.19 | 20.6; 0.28              | 14449/19597 | 1.003 (0.950, 1.059)    | 0.91 | 0.0; 0.81               | 13177/17821 |
| Smoking status, current/ex vs. never   | 1.030 (0.989, 1.073)     | 0.15 | 0.0; 0.91               | 11788/20037 | 1.006 (0.942, 1.075)    | 0.85 | 39.3; 0.14              | 10878/18265 |
| SEP, professional/managerial vs. other | 1.012 (0.967, 1.059)     | 0.60 | 0.0; 0.93               | 6643/15912  | 0.995 (0.944, 1.049)    | 0.87 | 0.0; 0.80               | 5927/14402  |

SEP: socio-economic position. Coefficients for rs492602: per G allele; rs2282679: per T allele. Models for height, weight, BMI and WHR based on z-scores. All coefficients adjusted for age and sex.

**Supplemental Table 4. Summary of Pooled Associations between Genotypes Associated with  $\beta$ -carotene and Anthropometry and Potential Confounders for Cognitive Capability**

| Potential<br>Confounder                | rs6564851 ( <i>BCMO1</i> ) |      |                         |             |
|----------------------------------------|----------------------------|------|-------------------------|-------------|
|                                        | Beta (95% CI)              | P    | I <sup>2</sup> %; Het P | n           |
| Height, cm                             | 0.007 (-0.008, 0.021)      | 0.36 | 0.0; 0.92               | 18069       |
| Weight, kg                             | 0.006 (-0.012, 0.025)      | 0.50 | 0.0; 0.76               | 17979       |
| BMI, kg/m <sup>2</sup>                 | 0.005 (-0.015, 0.026)      | 0.62 | 0.0; 0.75               | 17953       |
| WHR                                    | 0.003 (-0.012, 0.019)      | 0.66 | 0.0; 0.84               | 17617       |
|                                        | OR (95% CI)                | P    | I <sup>2</sup> %; Het P | n/N         |
| Physical activity, active vs. not      | 0.976 (0.921, 1.035)       | 0.42 | 35.1; 0.17              | 8783/17689  |
| Alcohol, weekly vs. less frequent      | 1.029 (0.980, 1.081)       | 0.25 | 0.0; 0.73               | 13145/17742 |
| Smoking status, current/ex vs. never   | 0.987 (0.938, 1.038)       | 0.60 | 20.8; 0.28              | 10831/18178 |
| SEP, professional/managerial vs. other | 1.006 (0.954, 1.062)       | 0.82 | 13.0; 0.33              | 5888/14304  |

SEP: socio-economic position. Coefficients per G allele. Models for height, weight, BMI and WHR based on z-scores. All coefficients adjusted for age and sex.

**Supplemental Table 5. Cognitive Capability by rs4820268 (*TMPRSS6*) Genotype and Cohort**

| Variable                    | Cohort        | G/G                | A/G                 | A/A                 | Total               | b (95% CI) <sup>1</sup>       | P           | Heterogeneity<br>I <sup>2</sup> %; P |
|-----------------------------|---------------|--------------------|---------------------|---------------------|---------------------|-------------------------------|-------------|--------------------------------------|
|                             |               | mean ± sd [n]      | mean ± sd [n]       | mean ± sd [n]       | mean ± sd [n]       |                               |             |                                      |
| Word recall- 10 words       | NCDS          | 6.09 ± 1.53 [1107] | 6.05 ± 1.52 [2622]  | 6.01 ± 1.47 [1546]  | 6.05 ± 1.50 [5275]  | -0.03 (-0.06, 0.01)           | 0.17        |                                      |
| Word recall- 45 words       | NSHD          | 23.93 ± 6.38 [535] | 23.85 ± 6.22 [1159] | 24.19 ± 6.32 [689]  | 23.97 ± 6.28 [2383] | 0.03 (-0.03, 0.08)            | 0.32        |                                      |
| Word recall- 20 words       | Whitehall II  | 7.02 ± 2.40 [678]  | 6.95 ± 2.36 [1536]  | 7.13 ± 2.47 [909]   | 7.02 ± 2.40 [3123]  | 0.01 (-0.04, 0.06)            | 0.66        |                                      |
| Word recall- 10 words       | ELSA          | 5.00 ± 1.66 [1136] | 5.00 ± 1.68 [2542]  | 4.99 ± 1.69 [1575]  | 5.00 ± 1.68 [5253]  | -0.00 (-0.04, 0.03)           | 0.81        |                                      |
|                             | <b>Pooled</b> | <b>[3456]</b>      | <b>[7859]</b>       | <b>[4719]</b>       | <b>[16034]</b>      | <b>-0.003 (-0.024, 0.018)</b> | <b>0.75</b> | <b>1.7; 0.38</b>                     |
| Phonemic fluency- 1 letter  | Whitehall II  | 16.09 ± 3.97 [676] | 15.95 ± 4.06 [1536] | 16.14 ± 4.24 [901]  | 16.03 ± 4.10 [3113] | -0.00 (-0.05, 0.04)           | 0.84        |                                      |
| Phonemic fluency- 3 letters | LBC1921       | 42.98 ± 11.25 [84] | 40.40 ± 12.39 [262] | 38.60 ± 12.20 [163] | 40.25 ± 12.21 [509] | -0.17 (-0.30, -0.05)          | 0.0076      |                                      |
|                             | <b>Pooled</b> | <b>[760]</b>       | <b>[1798]</b>       | <b>[1064]</b>       | <b>[3622]</b>       | <b>-0.078 (-0.240, 0.085)</b> | <b>0.35</b> | <b>83.1; 0.015</b>                   |
|                             | NCDS          | 22.5 ± 6.4 [1113]  | 22.5 ± 6.4 [2640]   | 22.5 ± 6.1 [1553]   | 22.5 ± 6.3 [5306]   | -0.00 (-0.04, 0.03)           | 0.80        |                                      |
|                             | NSHD          | 23.7 ± 7.0 [549]   | 23.7 ± 6.7 [1174]   | 23.7 ± 6.8 [702]    | 23.7 ± 6.8 [2425]   | -0.00 (-0.06, 0.05)           | 0.92        |                                      |
| Semantic fluency            | Whitehall II  | 16.0 ± 3.7 [678]   | 16.0 ± 3.6 [1541]   | 16.1 ± 4.0 [904]    | 16.0 ± 3.7 [3123]   | 0.00 (-0.04, 0.05)            | 0.89        |                                      |
|                             | CaPS          | 16.2 ± 4.7 [278]   | 16.5 ± 4.9 [593]    | 17.0 ± 4.6 [329]    | 16.6 ± 4.8 [1200]   | 0.08 (0.01, 0.16)             | 0.0331      |                                      |
|                             | ELSA          | 20.4 ± 6.1 [1137]  | 20.3 ± 6.2 [2545]   | 20.2 ± 6.1 [1575]   | 20.3 ± 6.1 [5257]   | -0.02 (-0.05, 0.02)           | 0.35        |                                      |
|                             | <b>Pooled</b> | <b>[3755]</b>      | <b>[8493]</b>       | <b>[5063]</b>       | <b>[17311]</b>      | <b>0.002 (-0.023, 0.026)</b>  | <b>0.90</b> | <b>27.5; 0.24</b>                    |
| Search speed-780 letters    | NCDS          | 332 ± 83 [1088]    | 334 ± 86 [2594]     | 334 ± 89 [1522]     | 333 ± 86 [5204]     | 0.01 (-0.03, 0.05)            | 0.60        |                                      |

Online Supporting Material

|                          |               |                 |                 |                 |                 |                              |             |                  |
|--------------------------|---------------|-----------------|-----------------|-----------------|-----------------|------------------------------|-------------|------------------|
| Search speed-600 letters | NSHD          | 283 ± 76 [543]  | 281 ± 76 [1171] | 283 ± 77 [699]  | 282 ± 76 [2413] | 0.01 (-0.04, 0.07)           | 0.70        |                  |
| Search speed-780 letters | ELSA          | 298 ± 89 [1126] | 299 ± 89 [2520] | 304 ± 91 [1558] | 300 ± 89 [5204] | 0.03 (-0.01, 0.07)           | 0.11        |                  |
|                          | <b>Pooled</b> | <b>[2757]</b>   | <b>[6285]</b>   | <b>[3779]</b>   | <b>[12821]</b>  | <b>0.019 (-0.005, 0.042)</b> | <b>0.12</b> | <b>0.0; 0.73</b> |

---

1: Beta coefficients based on z-scores per A allele adjusted for age, sex, height and weight.

**Supplemental Table 6. Cognitive Capability by rs1800562 (*HFE*) Genotype and Cohort**

| Variable                    | Cohort        | G/G                 | A/G+A/A            | Total               | b (95% CI) <sup>1</sup>        | P            | Heterogeneity<br>I <sup>2</sup> ; P |
|-----------------------------|---------------|---------------------|--------------------|---------------------|--------------------------------|--------------|-------------------------------------|
|                             |               | mean ± sd [n]       | mean ± sd [n]      | mean ± sd [n]       |                                |              |                                     |
| Word recall- 10 words       | NCDS          | 6.06 ± 1.51 [4617]  | 5.96 ± 1.48 [822]  | 6.04 ± 1.50 [5439]  | -0.06 (-0.13, 0.02)            | 0.14         |                                     |
| Word recall- 45 words       | NSHD          | 24.04 ± 6.28 [2050] | 23.46 ± 6.49 [354] | 23.95 ± 6.31 [2404] | -0.10 (-0.21, 0.02)            | 0.095        |                                     |
| Word recall- 20 words       | Whitehall II  | 7.03 ± 2.41 [2699]  | 6.89 ± 2.34 [436]  | 7.01 ± 2.40 [3135]  | -0.04 (-0.14, 0.06)            | 0.40         |                                     |
| Word recall- 10 words       | ELSA          | 4.87 ± 1.62 [2690]  | 4.87 ± 1.51 [437]  | 4.87 ± 1.60 [3127]  | -0.01 (-0.11, 0.08)            | 0.76         |                                     |
|                             | <b>Pooled</b> | <b>[12056]</b>      | <b>[2049]</b>      | <b>[14105]</b>      | <b>-0.049 (-0.095, -0.004)</b> | <b>0.033</b> | <b>0.0; 0.74</b>                    |
| Phonemic fluency- 1 letter  | Whitehall II  | 16.01 ± 4.14 [2690] | 16.09 ± 3.88 [435] | 16.02 ± 4.10 [3125] | 0.03 (-0.06, 0.13)             | 0.50         |                                     |
| Phonemic fluency- 3 letters | LBC1921       | 39.88 ± 12.25 [416] | 41.15 ± 12.52 [97] | 40.12 ± 12.30 [513] | 0.10 (-0.12, 0.33)             | 0.36         |                                     |
|                             | <b>Pooled</b> | <b>[3106]</b>       | <b>[532]</b>       | <b>[3638]</b>       | <b>0.046 (-0.044, 0.136)</b>   | <b>0.32</b>  | <b>0.0; 0.57</b>                    |
|                             | NCDS          | 22.5 ± 6.3 [4645]   | 22.4 ± 6.3 [827]   | 22.5 ± 6.3 [5472]   | -0.02 (-0.09, 0.05)            | 0.61         |                                     |
|                             | NSHD          | 23.7 ± 6.9 [2088]   | 23.4 ± 6.1 [358]   | 23.7 ± 6.8 [2446]   | -0.04 (-0.15, 0.07)            | 0.47         |                                     |
| Semantic fluency            | Whitehall II  | 16.0 ± 3.8 [2699]   | 15.9 ± 3.6 [436]   | 16.0 ± 3.7 [3135]   | -0.01 (-0.11, 0.09)            | 0.86         |                                     |
|                             | CaPS          | 16.4 ± 4.7 [1037]   | 17.0 ± 4.9 [173]   | 16.5 ± 4.8 [1210]   | 0.11 (-0.05, 0.26)             | 0.19         |                                     |
|                             | ELSA          | 19.9 ± 5.8 [2691]   | 19.9 ± 5.5 [438]   | 19.9 ± 5.8 [3129]   | -0.00 (-0.10, 0.09)            | 0.95         |                                     |
|                             | <b>Pooled</b> | <b>[13160]</b>      | <b>[2232]</b>      | <b>[15392]</b>      | <b>-0.007 (-0.051, 0.036)</b>  | <b>0.74</b>  | <b>0.0; 0.66</b>                    |
| Search speed-780 letters    | NCDS          | 334 ± 87 [4556]     | 327 ± 82 [809]     | 333 ± 86 [5365]     | -0.08 (-0.15, -0.01)           | 0.029        |                                     |

Online Supporting Material

|                          |               |                 |                |                 |                               |             |                   |
|--------------------------|---------------|-----------------|----------------|-----------------|-------------------------------|-------------|-------------------|
| Search speed-600 letters | NSHD          | 282 ± 76 [2075] | 284 ± 79 [358] | 282 ± 76 [2433] | 0.02 (-0.09, 0.13)            | 0.72        |                   |
| Search speed-780 letters | ELSA          | 298 ± 90 [2672] | 295 ± 83 [440] | 298 ± 89 [3112] | -0.05 (-0.15, 0.04)           | 0.29        |                   |
|                          | <b>Pooled</b> | <b>[9303]</b>   | <b>[1607]</b>  | <b>[10910]</b>  | <b>-0.049 (-0.105, 0.006)</b> | <b>0.08</b> | <b>12.1; 0.32</b> |

1: Beta coefficients based on z-scores A/G+A/A vs G/G adjusted for age and sex.

**Supplemental Table 7. Cognitive Capability by rs492602 (*FUT2*) Genotype and Cohort**

| Variable                    | Cohort        | A/A                 | A/G                 | G/G                 | Total               | b (95% CI) <sup>1</sup>       | P           | Heterogeneity<br>I <sup>2</sup> ; P |
|-----------------------------|---------------|---------------------|---------------------|---------------------|---------------------|-------------------------------|-------------|-------------------------------------|
|                             |               | mean ± sd [n]       | mean ± sd [n]       | mean ± sd [n]       | mean ± sd [n]       |                               |             |                                     |
| Word recall- 10 words       | NCDS          | 6.02 ± 1.53 [1761]  | 6.01 ± 1.50 [3644]  | 6.05 ± 1.49 [1864]  | 6.02 ± 1.50 [7269]  | 0.01 (-0.02, 0.04)            | 0.50        |                                     |
| Word recall- 45 words       | NSHD          | 23.65 ± 6.42 [573]  | 24.26 ± 6.23 [1220] | 23.61 ± 6.36 [608]  | 23.95 ± 6.31 [2401] | -0.00 (-0.06, 0.05)†          | 0.87        |                                     |
| Word recall- 20 words       | Whitehall II  | 7.00 ± 2.35 [758]   | 7.03 ± 2.37 [1566]  | 7.00 ± 2.51 [812]   | 7.01 ± 2.40 [3136]  | -0.02 (-0.07, 0.03)           | 0.42        |                                     |
| Word recall- 10 words       | ELSA          | 5.00 ± 1.68 [1391]  | 4.92 ± 1.71 [2730]  | 4.99 ± 1.66 [1368]  | 4.96 ± 1.69 [5489]  | -0.01 (-0.04, 0.02)           | 0.56        |                                     |
|                             | <b>Pooled</b> | <b>[4483]</b>       | <b>[9160]</b>       | <b>[4652]</b>       | <b>[18295]</b>      | <b>-0.003 (-0.023, 0.017)</b> | <b>0.75</b> | <b>0.0; 0.71</b>                    |
| Phonemic fluency- 1 letter  | Whitehall II  | 15.90 ± 4.11 [758]  | 16.06 ± 4.11 [1559] | 16.07 ± 4.07 [809]  | 16.02 ± 4.10 [3126] | 0.00 (-0.05, 0.05)            | 0.89        |                                     |
| Phonemic fluency- 3 letters | LBC1921       | 41.10 ± 12.33 [105] | 39.92 ± 12.49 [239] | 39.80 ± 12.04 [169] | 40.12 ± 12.30 [513] | -0.05 (-0.17, 0.07)           | 0.45        |                                     |
|                             | <b>Pooled</b> | <b>[863]</b>        | <b>[1798]</b>       | <b>[978]</b>        | <b>[3639]</b>       | <b>-0.004 (-0.048, 0.041)</b> | <b>0.88</b> | <b>0.0; 0.45</b>                    |
|                             | NCDS          | 22.6 ± 6.4 [1778]   | 22.4 ± 6.3 [3662]   | 22.4 ± 6.3 [1877]   | 22.5 ± 6.3 [7317]   | -0.02 (-0.05, 0.02)           | 0.34        |                                     |
|                             | NSHD          | 23.7 ± 6.6 [580]    | 23.7 ± 6.9 [1244]   | 23.5 ± 6.9 [619]    | 23.7 ± 6.8 [2443]   | -0.01 (-0.07, 0.04)           | 0.67        |                                     |

Online Supporting Material

|                          |               |                   |                   |                   |                   |                               |              |                   |
|--------------------------|---------------|-------------------|-------------------|-------------------|-------------------|-------------------------------|--------------|-------------------|
| Semantic fluency         | Whitehall II  | 15.9 ± 3.7 [759]  | 16.2 ± 3.7 [1566] | 15.8 ± 3.8 [811]  | 16.0 ± 3.7 [3136] | -0.03 (-0.08, 0.02)†          | 0.27         |                   |
|                          | CaPS          | 16.4 ± 4.8 [310]  | 16.6 ± 4.7 [572]  | 16.4 ± 4.8 [328]  | 16.5 ± 4.7 [1210] | 0.01 (-0.07, 0.08)            | 0.84         |                   |
|                          | ELSA          | 20.4 ± 6.2 [1393] | 20.1 ± 6.3 [2732] | 20.2 ± 5.9 [1368] | 20.2 ± 6.1 [5493] | -0.02 (-0.06, 0.01)           | 0.17         |                   |
|                          | <b>Pooled</b> | <b>[4820]</b>     | <b>[9776]</b>     | <b>[5003]</b>     | <b>[19599]</b>    | <b>-0.018 (-0.038, 0.001)</b> | <b>0.064</b> | <b>0.0; 0.94</b>  |
| Search speed-780 letters | NCDS          | 333 ± 85 [1753]   | 335 ± 89 [3586]   | 331 ± 84 [1844]   | 333 ± 87 [7183]   | -0.01 (-0.04, 0.02)           | 0.60         |                   |
| Search speed-600 letters | NSHD          | 285 ± 81 [576]    | 284 ± 76 [1239]   | 275 ± 70 [615]    | 282 ± 76 [2430]   | -0.06 (-0.12, -0.01)          | 0.030        |                   |
| Search speed-780 letters | ELSA          | 304 ± 93 [1376]   | 296 ± 88 [2686]   | 299 ± 90 [1364]   | 299 ± 90 [5426]   | -0.03 (-0.06, 0.01)†          | 0.13         |                   |
|                          | <b>Pooled</b> | <b>[3705]</b>     | <b>[7511]</b>     | <b>[3823]</b>     | <b>[15039]</b>    | <b>-0.026 (-0.052, 0.000)</b> | <b>0.053</b> | <b>25.9; 0.26</b> |

†Full genotype model representing a significantly better fit than the given per allele model.  
 1: Beta coefficients based on z-scores per G allele adjusted for age and sex.

**Supplemental Table 8. Cognitive Capability by rs2282679 (GC) Genotype and Cohort**

| Variable              | Cohort        | G/G                | G/T                | T/T                 | Total               | b (95% CI) <sup>1</sup>        | P            | Heterogeneity      |
|-----------------------|---------------|--------------------|--------------------|---------------------|---------------------|--------------------------------|--------------|--------------------|
|                       |               | mean ± sd [n]      | mean ± sd [n]      | mean ± sd [n]       | mean ± sd [n]       |                                |              | I <sup>2</sup> ; P |
| Word recall- 10 words | NCDS          | 6.14 ± 1.50 [457]  | 6.02 ± 1.45 [2265] | 6.04 ± 1.54 [2702]  | 6.04 ± 1.50 [5424]  | -0.01 (-0.06, 0.03)            | 0.49         |                    |
| Word recall- 45 words | NSHD          | 23.57 ± 6.53 [194] | 24.21 ± 6.19 [991] | 23.83 ± 6.27 [1290] | 23.96 ± 6.26 [2475] | -0.01 (-0.07, 0.06)            | 0.85         |                    |
| Word recall- 20 words | Whitehall II  | 7.11 ± 2.27 [259]  | 7.04 ± 2.38 [1313] | 6.97 ± 2.43 [1551]  | 7.01 ± 2.39 [3123]  | -0.03 (-0.08, 0.02)            | 0.29         |                    |
| Word recall- 10 words | ELSA          | 4.99 ± 1.63 [463]  | 5.01 ± 1.70 [2249] | 4.92 ± 1.68 [2793]  | 4.96 ± 1.69 [5505]  | -0.04 (-0.08, -0.00)           | 0.034        |                    |
|                       | <b>Pooled</b> | <b>[1373]</b>      | <b>[6818]</b>      | <b>[8336]</b>       | <b>[16527]</b>      | <b>-0.026 (-0.048, -0.003)</b> | <b>0.028</b> | <b>0.0; 0.73</b>   |

Online Supporting Material

|                             |               |                    |                     |                     |                     |                               |             |                    |
|-----------------------------|---------------|--------------------|---------------------|---------------------|---------------------|-------------------------------|-------------|--------------------|
| Phonemic fluency- 1 letter  | Whitehall II  | 16.02 ± 3.98 [257] | 15.93 ± 4.18 [1311] | 16.11 ± 4.07 [1546] | 16.03 ± 4.11 [3114] | 0.03 (-0.03, 0.08)            | 0.35        |                    |
| Phonemic fluency- 3 letters | LBC1921       | 43.87 ± 13.69 [47] | 40.33 ± 11.53 [203] | 39.44 ± 12.41 [261] | 40.20 ± 12.23 [511] | -0.14 (-0.27, -0.01)          | 0.039       |                    |
|                             | <b>Pooled</b> | <b>[304]</b>       | <b>[1514]</b>       | <b>[1807]</b>       | <b>[3625]</b>       | <b>-0.045 (-0.205, 0.114)</b> | <b>0.58</b> | <b>80.6; 0.023</b> |
|                             | NCDS          | 22.8 ± 6.0 [459]   | 22.5 ± 6.3 [2281]   | 22.4 ± 6.3 [2717]   | 22.5 ± 6.3 [5457]   | -0.02 (-0.06, 0.02)           | 0.32        |                    |
|                             | NSHD          | 24.5 ± 7.6 [197]   | 23.7 ± 6.7 [1012]   | 23.4 ± 6.9 [1314]   | 23.6 ± 6.9 [2523]   | -0.06 (-0.12, 0.00)           | 0.052       |                    |
| Semantic fluency            | Whitehall II  | 15.8 ± 3.8 [259]   | 15.9 ± 3.8 [1313]   | 16.1 ± 3.7 [1551]   | 16.0 ± 3.7 [3123]   | 0.04 (-0.01, 0.09)            | 0.13        |                    |
|                             | CaPS          | 16.0 ± 4.8 [105]   | 16.6 ± 4.8 [480]    | 16.6 ± 4.7 [630]    | 16.6 ± 4.8 [1215]   | 0.05 (-0.04, 0.13)            | 0.29        |                    |
|                             | ELSA          | 20.3 ± 6.3 [463]   | 20.3 ± 6.1 [2249]   | 20.1 ± 6.2 [2797]   | 20.2 ± 6.1 [5509]   | -0.03 (-0.07, 0.01)           | 0.12        |                    |
|                             | <b>Pooled</b> | <b>[1483]</b>      | <b>[7335]</b>       | <b>[9009]</b>       | <b>[17 827]</b>     | <b>-0.010 (-0.046, 0.026)</b> | <b>0.59</b> | <b>56.3; 0.057</b> |
| Search speed-780 letters    | NCDS          | 327 ± 77 [450]     | 336 ± 88 [2237]     | 332 ± 86 [2666]     | 333 ± 86 [5353]     | -0.01 (-0.05, 0.03)†          | 0.72        |                    |
| Search speed-600 letters    | NSHD          | 281 ± 71 [196]     | 281 ± 75 [1008]     | 282 ± 78 [1307]     | 282 ± 76 [2511]     | 0.01 (-0.05, 0.07)            | 0.70        |                    |
| Search speed-780 letters    | ELSA          | 300 ± 91 [454]     | 299 ± 90 [2228]     | 299 ± 91 [2759]     | 299 ± 90 [5441]     | -0.00 (-0.04, 0.04)           | 0.83        |                    |
|                             | <b>Pooled</b> | <b>[1100]</b>      | <b>[5473]</b>       | <b>[6732]</b>       | <b>[13 305]</b>     | <b>-0.003 (-0.029, 0.023)</b> | <b>0.84</b> | <b>0.0; 0.87</b>   |

†Full genotype model representing a significantly better fit than the given per allele model.  
 1: Beta coefficients based on z-scores per T allele adjusted for age and sex.



**Supplemental Table 9. Cognitive Capability by rs6564851 (*BCMO1*) Genotype and Cohort**

| Variable                    | Cohort        | T/T                | G/T                 | G/G                 | Total               | b (95% CI) <sup>1</sup>       | P           | Heterogeneity<br>I <sup>2</sup> ; P |
|-----------------------------|---------------|--------------------|---------------------|---------------------|---------------------|-------------------------------|-------------|-------------------------------------|
|                             |               | mean ± sd [n]      | mean ± sd [n]       | mean ± sd [n]       | mean ± sd [n]       |                               |             |                                     |
| Word recall- 10 words       | NCDS          | 5.97 ± 1.53 [1208] | 6.06 ± 1.50 [2675]  | 6.06 ± 1.48 [1552]  | 6.04 ± 1.50 [5435]  | 0.03 (-0.01, 0.06)            | 0.15        |                                     |
| Word recall- 45 words       | NSHD          | 23.43 ± 6.17 [482] | 23.86 ± 6.35 [1183] | 24.46 ± 6.32 [735]  | 23.96 ± 6.31 [2400] | 0.08 (0.03, 0.14)             | 0.0042      |                                     |
| Word recall- 20 words       | Whitehall II  | 7.17 ± 2.40 [691]  | 6.96 ± 2.44 [1519]  | 6.98 ± 2.33 [925]   | 7.01 ± 2.40 [3135]  | -0.04 (-0.08, 0.01)           | 0.14        |                                     |
| Word recall- 10 words       | ELSA          | 4.95 ± 1.69 [1213] | 4.96 ± 1.69 [2692]  | 4.96 ± 1.69 [1583]  | 4.96 ± 1.69 [5488]  | 0.02 (-0.02, 0.05)            | 0.33        |                                     |
|                             | <b>Pooled</b> | <b>[3594]</b>      | <b>[8069]</b>       | <b>[4795]</b>       | <b>[16458]</b>      | <b>0.021 (-0.018, 0.060)</b>  | <b>0.29</b> | <b>70.5; 0.017</b>                  |
| Phonemic fluency- 1 letter  | Whitehall II  | 16.10 ± 3.88 [690] | 16.04 ± 4.25 [1513] | 15.95 ± 4.02 [922]  | 16.03 ± 4.10 [3125] | -0.02 (-0.07, 0.03)           | 0.44        |                                     |
| Phonemic fluency- 3 letters | LBC1921       | 42.10 ± 13.52 [91] | 39.95 ± 11.95 [259] | 39.29 ± 12.09 [163] | 40.12 ± 12.30 [513] | -0.10 (-0.23, 0.02)           | 0.10        |                                     |
|                             | <b>Pooled</b> | <b>[781]</b>       | <b>[1772]</b>       | <b>[1085]</b>       | <b>[3638]</b>       | <b>-0.042 (-0.116, 0.033)</b> | <b>0.27</b> | <b>36.6; 0.21</b>                   |
|                             | NCDS          | 22.7 ± 6.4 [1216]  | 22.4 ± 6.3 [2691]   | 22.5 ± 6.2 [1561]   | 22.5 ± 6.3 [5468]   | -0.02 (-0.05, 0.02)           | 0.37        |                                     |
|                             | NSHD          | 23.7 ± 6.6 [495]   | 23.4 ± 6.8 [1201]   | 24.1 ± 6.9 [746]    | 23.7 ± 6.8 [2442]   | 0.03 (-0.02, 0.09)            | 0.22        |                                     |
| Semantic fluency            | Whitehall II  | 16.3 ± 3.7 [693]   | 15.9 ± 3.8 [1517]   | 16.0 ± 3.7 [925]    | 16.0 ± 3.7 [3135]   | -0.04 (-0.09, 0.00)           | 0.064       |                                     |
|                             | CaPS          | 16.4 ± 5.1 [264]   | 16.7 ± 4.8 [578]    | 16.3 ± 4.5 [362]    | 16.5 ± 4.8 [1204]   | -0.01 (-0.09, 0.07)           | 0.76        |                                     |
|                             | ELSA          | 20.3 ± 6.2 [1214]  | 20.0 ± 6.1 [2695]   | 20.3 ± 6.1 [1583]   | 20.2 ± 6.1 [5492]   | 0.01 (-0.03, 0.04)            | 0.68        |                                     |
|                             | <b>Pooled</b> | <b>[3882]</b>      | <b>[8682]</b>       | <b>[5177]</b>       | <b>[17741]</b>      | <b>-0.007 (-0.032, 0.017)</b> | <b>0.57</b> | <b>27.7; 0.24</b>                   |
| Search speed-780 letters    | NCDS          | 332 ± 88 [1194]    | 334 ± 88 [2633]     | 333 ± 82 [1534]     | 333 ± 86 [5361]     | 0.00 (-0.03, 0.04)            | 0.85        |                                     |

Online Supporting Material

|                          |               |                 |                 |                 |                 |                              |             |                  |
|--------------------------|---------------|-----------------|-----------------|-----------------|-----------------|------------------------------|-------------|------------------|
| Search speed-600 letters | NSHD          | 282 ± 77 [492]  | 283 ± 75 [1195] | 280 ± 78 [742]  | 282 ± 76 [2429] | -0.02 (-0.08, 0.04)          | 0.49        |                  |
| Search speed-780 letters | ELSA          | 298 ± 88 [1198] | 298 ± 91 [2659] | 300 ± 92 [1566] | 299 ± 91 [5423] | 0.02 (-0.01, 0.06)           | 0.19        |                  |
|                          | <b>Pooled</b> | <b>[2884]</b>   | <b>[6487]</b>   | <b>[3842]</b>   | <b>[13213]</b>  | <b>0.008 (-0.015, 0.031)</b> | <b>0.50</b> | <b>0.0; 0.42</b> |

---

1: Beta coefficients based on z-scores per G allele adjusted for age and sex.
